# Supplementary material for: Immunogenicity and Tolerability of a SARS-CoV-2 TNX-1800, a Live Recombinant Poxvirus Vaccine Candidate, in Syrian Hamsters and New Zealand White Rabbits
Source: MDPI journal article supplement (doi:10.3390/v15102131), 2023-10-21
Supplement: s1 [file s1]

## Supplementary Information:

**Table S1.** The body weight of rabbits and hamsters monitored throughout the study.

| Individual Bodyweights - Hamsters |                               |        |        |        |        |        |        |        |        |  |
|-----------------------------------|-------------------------------|--------|--------|--------|--------|--------|--------|--------|--------|--|
| Sex: Both Bodyweight (grams)      |                               |        |        |        |        |        |        |        |        |  |
| Group 1                           | Day(s) Relative to Start Date |        |        |        |        |        |        |        |        |  |
|                                   | 1                             | 5      | 9      | 12     | 15     | 19     | 22     | 26     | 28     |  |
| 18494                             | 116.3                         | 118.0  | 119.6  | 119.4  | 121.0  | 123.7  | 125.0  | 127.0  | 127.8  |  |
| 18495                             | 128.2                         | 128.0  | 127.7  | 126.8  | 127.0  | 128.5  | 128.4  | 131.0  | 128.0  |  |
| 18502                             | 118.6                         | 120.8  | 126.8  | 130.1  | 129.6  | 132.2  | 132.9  | 135.0  | 137.4  |  |
| Mean                              | 121.03                        | 122.27 | 124.70 | 125.43 | 125.87 | 128.13 | 128.77 | 131.00 | 131.07 |  |
| SD                                | 6.31                          | 5.16   | 4.44   | 5.48   | 4.41   | 4.26   | 3.96   | 4.00   | 5.49   |  |
| N                                 | 3                             | 3      | 3      | 3      | 3      | 3      | 3      | 3      | 3      |  |

  

| Individual Bodyweights - Hamsters |                               |        |        |        |        |        |        |        |        |  |
|-----------------------------------|-------------------------------|--------|--------|--------|--------|--------|--------|--------|--------|--|
| Sex: Both Bodyweight (grams)      |                               |        |        |        |        |        |        |        |        |  |
| Group 2                           | Day(s) Relative to Start Date |        |        |        |        |        |        |        |        |  |
|                                   | 1                             | 5      | 9      | 12     | 15     | 19     | 22     | 26     | 28     |  |
| 18496                             | 125.0                         | 119.6  | 119.0  | 119.3  | 120.0  | 122.5  | 124.7  | 126.0  | 129.3  |  |
| 18503                             | 131.0                         | 134.2  | 135.0  | 135.8  | 135.5  | 137.2  | 137.2  | 139.0  | 140.2  |  |
| 18504                             | 135.7                         | 136.5  | 135.0  | 133.4  | 131.0  | 134.7  | 138.0  | 139.0  | 140.0  |  |
| Mean                              | 130.57                        | 130.10 | 129.67 | 129.50 | 128.83 | 131.47 | 133.30 | 134.67 | 136.50 |  |
| SD                                | 5.36                          | 9.17   | 9.24   | 8.91   | 7.97   | 7.46   | 7.51   | 6.24   | 6.24   |  |
| N                                 | 3                             | 3      | 3      | 3      | 3      | 3      | 3      | 3      | 3      |  |

  

| Individual Bodyweights - Hamsters |                               |        |        |        |        |        |        |        |        |  |
|-----------------------------------|-------------------------------|--------|--------|--------|--------|--------|--------|--------|--------|--|
| Sex: Both Bodyweight (grams)      |                               |        |        |        |        |        |        |        |        |  |
| Group 3                           | Day(s) Relative to Start Date |        |        |        |        |        |        |        |        |  |
|                                   | 1                             | 5      | 9      | 12     | 15     | 19     | 22     | 26     | 28     |  |
| 18497                             | 128.0                         | 127.5  | 125.0  | 126.9  | 128.0  | 128.4  | 128.3  | 127.0  | 127.3  |  |
| 18498                             | 111.5                         | 110.1  | 109.5  | 110.3  | 107.0  | 110.2  | 109.0  | 112.0  | 113.0  |  |
| 18505                             | 128.5                         | 126.1  | 126.8  | 126.4  | 127.4  | 128.0  | 128.5  | 129.0  | 131.4  |  |
| Mean                              | 122.67                        | 121.23 | 120.43 | 121.20 | 120.80 | 122.20 | 121.93 | 122.67 | 123.90 |  |
| SD                                | 9.67                          | 9.67   | 9.51   | 9.44   | 11.95  | 10.39  | 11.20  | 9.29   | 9.66   |  |
| N                                 | 3                             | 3      | 3      | 3      | 3      | 3      | 3      | 3      | 3      |  |

  

| Individual Bodyweights - Hamsters |                               |        |        |        |        |        |        |        |        |  |
|-----------------------------------|-------------------------------|--------|--------|--------|--------|--------|--------|--------|--------|--|
| Sex: Both Bodyweight (grams)      |                               |        |        |        |        |        |        |        |        |  |
| Group 4                           | Day(s) Relative to Start Date |        |        |        |        |        |        |        |        |  |
|                                   | 1                             | 5      | 9      | 12     | 15     | 19     | 22     | 26     | 28     |  |
| 18499                             | 137.0                         | 136.3  | 139.2  | 138.8  | 140.6  | 139.7  | 140.0  | 142.0  | 142.0  |  |
| 18506                             | 122.7                         | 123.6  | 120.6  | 120.2  | -      | 117.1  | 117.0  | 120.0  | 120.0  |  |
| Mean                              | 129.85                        | 129.95 | 129.90 | 129.50 | 140.60 | 128.40 | 128.50 | 131.00 | 131.00 |  |
| SD                                | 10.11                         | 8.98   | 13.15  | 13.15  | -      | 15.98  | 16.26  | 15.56  | 15.56  |  |
| N                                 | 2                             | 2      | 2      | 2      | 1      | 2      | 2      | 2      | 2      |  |

  

| Individual Bodyweights - Rabbits |                               |      |      |      |      |      |      |      |      |  |
|----------------------------------|-------------------------------|------|------|------|------|------|------|------|------|--|
| Sex: Both Bodyweight (kg)        |                               |      |      |      |      |      |      |      |      |  |
| Group 5                          | Day(s) Relative to Start Date |      |      |      |      |      |      |      |      |  |
|                                  | 1                             | 5    | 9    | 12   | 15   | 19   | 22   | 26   | 28   |  |
| 18480                            | 3.2                           | 3.2  | 3.1  | 3.2  | 3.2  | 3.3  | 3.3  | 3.4  | 3.3  |  |
| 18481                            | 2.8                           | 3.0  | 3.1  | 3.1  | 3.1  | 3.1  | 3.2  | 3.1  | 3.2  |  |
| 18487                            | 2.3                           | 2.4  | 2.5  | 2.6  | 2.6  | 2.7  | 2.7  | 2.7  | 2.7  |  |
| Mean                             | 2.77                          | 2.87 | 2.90 | 2.97 | 2.97 | 3.03 | 3.07 | 3.07 | 3.07 |  |
| SD                               | 0.45                          | 0.42 | 0.35 | 0.32 | 0.32 | 0.31 | 0.32 | 0.35 | 0.32 |  |
| N                                | 3                             | 3    | 3    | 3    | 3    | 3    | 3    | 3    | 3    |  |

  

| Individual Bodyweights - Rabbits |                               |      |      |      |      |      |      |      |      |  |
|----------------------------------|-------------------------------|------|------|------|------|------|------|------|------|--|
| Sex: Both Bodyweight (kg)        |                               |      |      |      |      |      |      |      |      |  |
| Group 6                          | Day(s) Relative to Start Date |      |      |      |      |      |      |      |      |  |
|                                  | 1                             | 5    | 9    | 12   | 15   | 19   | 22   | 26   | 28   |  |
| 18486                            | -                             | 3.2  | 3.2  | 3.3  | 3.3  | 3.3  | 3.3  | 3.4  | 3.2  |  |
| 18488                            | 2.5                           | 2.6  | 2.8  | 2.8  | 2.9  | 3.0  | 3.1  | 3.1  | 2.9  |  |
| 18489                            | 2.5                           | 2.6  | 2.7  | 2.8  | 2.8  | 2.9  | 2.9  | 2.9  | 2.8  |  |
| Mean                             | 2.50                          | 2.80 | 2.90 | 2.97 | 3.00 | 3.07 | 3.10 | 3.13 | 2.97 |  |
| SD                               | 0.00                          | 0.35 | 0.26 | 0.29 | 0.26 | 0.21 | 0.20 | 0.25 | 0.21 |  |
| N                                | 2                             | 3    | 3    | 3    | 3    | 3    | 3    | 3    | 3    |  |

  

| Individual Bodyweights - Rabbits |                               |      |      |      |      |      |      |      |      |  |
|----------------------------------|-------------------------------|------|------|------|------|------|------|------|------|--|
| Sex: Both Bodyweight (kg)        |                               |      |      |      |      |      |      |      |      |  |
| Group 7                          | Day(s) Relative to Start Date |      |      |      |      |      |      |      |      |  |
|                                  | 1                             | 5    | 9    | 12   | 15   | 19   | 22   | 26   | 28   |  |
| 18483                            | 3.1                           | 2.9  | 3.0  | 3.1  | 3.1  | 3.1  | 3.2  | 3.3  | 3.3  |  |
| 18484                            | 3.0                           | 2.1  | 3.2  | 3.2  | 3.2  | 3.3  | 3.3  | 3.2  | 3.1  |  |
| 18490                            | 2.5                           | 2.6  | 2.7  | 2.7  | 2.7  | 2.8  | 2.8  | 2.8  | 2.8  |  |
| Mean                             | 2.87                          | 2.53 | 2.97 | 3.00 | 3.00 | 3.10 | 3.10 | 3.10 | 3.07 |  |
| SD                               | 0.32                          | 0.40 | 0.25 | 0.26 | 0.26 | 0.25 | 0.26 | 0.26 | 0.25 |  |
| N                                | 3                             | 3    | 3    | 3    | 3    | 3    | 3    | 3    | 3    |  |

  

| Individual Bodyweights - Rabbits |                               |      |      |      |      |      |      |      |      |  |
|----------------------------------|-------------------------------|------|------|------|------|------|------|------|------|--|
| Sex: Both Bodyweight (kg)        |                               |      |      |      |      |      |      |      |      |  |
| Group 8                          | Day(s) Relative to Start Date |      |      |      |      |      |      |      |      |  |
|                                  | 1                             | 5    | 9    | 12   | 15   | 19   | 22   | 26   | 28   |  |
| 18485                            | 3.0                           | 3.0  | 3.1  | 3.2  | 3.2  | 3.2  | 3.2  | 3.2  | 3.2  |  |
| 18492                            | 2.4                           | 2.5  | 2.6  | 2.7  | 2.7  | 2.8  | 2.8  | 2.8  | 2.7  |  |
| Mean                             | 2.70                          | 2.75 | 2.85 | 2.95 | 2.95 | 3.00 | 3.00 | 3.00 | 2.95 |  |
| SD                               | 0.42                          | 0.35 | 0.35 | 0.35 | 0.35 | 0.28 | 0.28 | 0.28 | 0.35 |  |
| N                                | 2                             | 2    | 2    | 2    | 2    | 2    | 2    | 2    | 2    |  |

**Table S2.** Draize score and poxvirus gene copy number (\*) in rabbits and hamsters monitored during different time points.

| Species  | Group | Animal | Day 1 (2 hr post) |       | Day 1 (5 hr post) |       | Day 2    |       | Day 3    |       | Day 4    |       | Day 5    |       | Day 10   |       | Day 20   |       | Mean Copy number |
|----------|-------|--------|-------------------|-------|-------------------|-------|----------|-------|----------|-------|----------|-------|----------|-------|----------|-------|----------|-------|------------------|
|          |       |        | Erythema          | Edema | Erythema          | Edema | Erythema | Edema | Erythema | Edema | Erythema | Edema | Erythema | Edema | Erythema | Edema | Erythema | Edema |                  |
| Hamsters | 1     | 18494  | 2                 | 0     | 2                 | 0     | 2        | 0     | 2        | 0     | 0        | 1     | 1        | 1     | 1        | 0     | 0        | 0     | 0                |
|          | 1     | 18495  | 1                 | 0     | 1                 | 0     | 1        | 0     | 1        | 0     | 1        | 0     | 1        | 0     | 1        | 0     | 0        | 0     | 0                |
|          | 1     | 18502  | 1                 | 0     | 1                 | 0     | 1        | 0     | 1        | 0     | 1        | 0     | 1        | 1     | 1        | 0     | 0        | 0     | 0                |
|          | 2     | 18503  | 1                 | 0     | 1                 | 0     | 1        | 0     | 1        | 0     | 1        | 0     | 1        | 0     | 0        | 0     | 0        | 0     | 0                |
|          | 2     | 18504  | 1                 | 0     | 0                 | 0     | 1        | 0     | 1        | 0     | 0        | 0     | 1        | 0     | 0        | 0     | 0        | 0     | 0                |
|          | 2     | 18496  | 2                 | 0     | 2                 | 0     | 2        | 0     | 1        | 0     | 1        | 0     | 2        | 0     | 1        | 0     | 0        | 0     | 0                |
|          | 3     | 18497  | 1                 | 0     | 0                 | 0     | 0        | 1     | 1        | 0     | 1        | 0     | 1        | 0     | 1        | 0     | 0        | 0     | 0                |
|          | 3     | 18498  | 1                 | 0     | 0                 | 0     | 0        | 0     | 0        | 0     | 1        | 0     | 0        | 1     | 0        | 0     | 0        | 0     | 0                |
|          | 3     | 18505  | 1                 | 0     | 0                 | 0     | 0        | 0     | 0        | 0     | 0        | 1     | 1        | 0     | 0        | 0     | 0        | 0     | 0                |
|          | 4     | 18499  | 1                 | 0     | 1                 | 0     | 1        | 0     | 1        | 0     | 1        | 0     | 2        | 0     | 1        | 0     | 0        | 0     | 0                |
| Rabbits  | 4     | 18506  | 1                 | 0     | 0                 | 0     | 0        | 1     | 0        | 0     | 0        | 1     | 0        | 0     | 0        | 0     | 0        | 0     | 0                |
|          | 5     | 18480  | 0                 | 1     | 0                 | 0     | 0        | 1     | 0        | 0     | 0        | 1     | 2        | 1     | 1        | 0     | 1        | 0     | 0                |
|          | 5     | 18481  | 2                 | 0     | 2                 | 0     | 1        | 0     | 1        | 0     | 2        | 1     | 2        | 1     | 2        | 1     | 1        | 0     | 0                |
|          | 5     | 18487  | 0                 | 0     | 0                 | 0     | 0        | 0     | 0        | 1     | 2        | 0     | 2        | 0     | 1        | 1     | 1        | 0     | 0                |
|          | 6     | 18488  | 1                 | 0     | 0                 | 0     | 0        | 1     | 0        | 1     | 0        | 1     | 0        | 1     | 0        | 1     | 0        | 0     | 0                |
|          | 6     | 18489  | 1                 | 0     | 1                 | 0     | 0        | 0     | 0        | 0     | 0        | 1     | 0        | 1     | 1        | 1     | 0        | 0     | 0                |
|          | 6     | 18486  | 2                 | 0     | 2                 | 0     | 1        | 0     | 1        | 0     | 2        | 1     | 2        | 2     | 2        | 0     | 1        | 0     | 0                |
|          | 7     | 18483  | 2                 | 0     | 2                 | 0     | 2        | 0     | 1        | 0     | 1        | 1     | 2        | 0     | 2        | 1     | 1        | 0     | 0                |
|          | 7     | 18484  | 1                 | 0     | 1                 | 1     | 1        | 1     | 0        | 0     | 0        | 1     | 2        | 0     | 2        | 0     | 1        | 0     | 0                |
|          | 7     | 18490  | 1                 | 1     | 1                 | 1     | 1        | 1     | 1        | 1     | 0        | 1     | 1        | 0     | 0        | 1     | 2        | 0     | 0                |
|          | 8     | 18485  | 1                 | 0     | 1                 | 0     | 1        | 1     | 1        | 1     | 2        | 2     | 3        | 1     | 3        | 1     | 1        | 0     | 0                |
|          | 8     | 18492  | 1                 | 1     | 1                 | 1     | 1        | 1     | 0        | 1     | 2        | 0     | 2        | 1     | 3        | 0     | 1        | 0     | 0                |
